# Supplementary material
Source: MDPI journal article supplement (https://www.mdpi.com/2304-6740/5/2/33)

# checkCIF/PLATON report

You have not supplied any structure factors. As a result the full set of tests cannot be run.

THIS REPORT IS FOR GUIDANCE ONLY. IF USED AS PART OF A REVIEW PROCEDURE FOR PUBLICATION, IT SHOULD NOT REPLACE THE EXPERTISE OF AN EXPERIENCED CRYSTALLOGRAPHIC REFEREE.

No syntax errors found.      CIF dictionary      Interpreting this report

## Datablock: 2a

---

Bond precision:    C-C = 0.0033 Å                      Wavelength=0.71073

Cell:                      a=8.9827(2)              b=23.6098(6)              c=22.1855(5)  
                                alpha=90              beta=90.818(1)              gamma=90

Temperature:              193 K

|                        | Calculated        | Reported          |
|------------------------|-------------------|-------------------|
| Volume                 | 4704.62(19)       | 4704.62(19)       |
| Space group            | P 21/n            | P2(1)/n           |
| Hall group             | -P 2yn            | ?                 |
| Moiety formula         | C49 H62 I Mg N3 O | ?                 |
| Sum formula            | C49 H62 I Mg N3 O | C49 H62 I Mg N3 O |
| Mr                     | 860.23            | 860.23            |
| Dx, g cm <sup>-3</sup> | 1.214             | 1.215             |
| Z                      | 4                 | 4                 |
| Mu (mm <sup>-1</sup> ) | 0.730             | 0.730             |
| F000                   | 1800.0            | 1800.0            |
| F000'                  | 1798.79           |                   |
| h, k, lmax             | 12, 32, 30        | 12, 32, 30        |
| Nref                   | 12871             | 12780             |
| Tmin, Tmax             | 0.743, 0.775      | 0.381, 0.451      |
| Tmin'                  | 0.616             |                   |

Correction method= # Reported T Limits: Tmin=0.381 Tmax=0.451  
AbsCorr = MULTISCAN

Data completeness= 0.993                      Theta(max)= 29.300

R(reflections)= 0.0363( 7680)              wR2(reflections)= 0.0938( 12780)

S = 0.929                      Npar= 521

---

The following ALERTS were generated. Each ALERT has the format  
**test-name\_ALERT\_alert-type\_alert-level.**  
Click on the hyperlinks for more details of the test.

---

### Alert level B

|                   |                         |     |    |     |    |           |
|-------------------|-------------------------|-----|----|-----|----|-----------|
| PLAT230_ALERT_2_B | Hirshfeld Test Diff for | O53 | -- | C54 | .. | 13.0 s.u. |
| PLAT230_ALERT_2_B | Hirshfeld Test Diff for | C54 | -- | C55 | .. | 8.0 s.u.  |

---

### Alert level C

ABSTY02\_ALERT\_1\_C An \_exptl\_absorpt\_correction\_type has been given without a literature citation. This should be contained in the \_exptl\_absorpt\_process\_details field.  
Absorption correction given as multi-scan

CRYSC01\_ALERT\_1\_C The word below has not been recognised as a standard identifier.  
rod

CRYSC01\_ALERT\_1\_C No recognised colour has been given for crystal colour.

|                   |                                                |                               |       |        |
|-------------------|------------------------------------------------|-------------------------------|-------|--------|
| PLAT213_ALERT_2_C | Atom C443                                      | has ADP max/min Ratio .....   | 3.7   | prolat |
| PLAT220_ALERT_2_C | Non-Solvent Resd 1                             | C Ueq(max)/Ueq(min) Range     | 4.5   | Ratio  |
| PLAT222_ALERT_3_C | Non-Solvent Resd 1                             | H Uiso(max)/Uiso(min) Range   | 4.8   | Ratio  |
| PLAT230_ALERT_2_C | Hirshfeld Test Diff for                        | C22 -- C221 ..                | 5.5   | s.u.   |
| PLAT230_ALERT_2_C | Hirshfeld Test Diff for                        | C51 -- C52 ..                 | 6.5   | s.u.   |
| PLAT230_ALERT_2_C | Hirshfeld Test Diff for                        | C64 -- C65 ..                 | 5.5   | s.u.   |
| PLAT245_ALERT_2_C | U(iso) H23A                                    | Smaller than U(eq) C23 by ... | 0.016 | AngSq  |
| PLAT601_ALERT_2_C | Structure Contains Solvent Accessible VOIDS of | .                             | 32    | Ang3   |

---

### Alert level G

|                   |                                                  |        |        |
|-------------------|--------------------------------------------------|--------|--------|
| PLAT002_ALERT_2_G | Number of Distance or Angle Restraints on AtSite | 3      | Note   |
| PLAT005_ALERT_5_G | No Embedded Refinement Details found in the CIF  | Please | Do !   |
| PLAT063_ALERT_4_G | Crystal Size Likely too Large for Beam Size .... | 0.65   | mm     |
| PLAT300_ALERT_4_G | Atom Site Occupancy of C443 is Constrained at    | 0.67   | Check  |
| PLAT300_ALERT_4_G | Atom Site Occupancy of C444 is Constrained at    | 0.33   | Check  |
| PLAT300_ALERT_4_G | Atom Site Occupancy of H44D is Constrained at    | 0.67   | Check  |
| PLAT300_ALERT_4_G | Atom Site Occupancy of H44E is Constrained at    | 0.67   | Check  |
| PLAT300_ALERT_4_G | Atom Site Occupancy of H44F is Constrained at    | 0.67   | Check  |
| PLAT300_ALERT_4_G | Atom Site Occupancy of H44J is Constrained at    | 0.67   | Check  |
| PLAT300_ALERT_4_G | Atom Site Occupancy of H44G is Constrained at    | 0.33   | Check  |
| PLAT300_ALERT_4_G | Atom Site Occupancy of H44H is Constrained at    | 0.33   | Check  |
| PLAT300_ALERT_4_G | Atom Site Occupancy of H44I is Constrained at    | 0.33   | Check  |
| PLAT300_ALERT_4_G | Atom Site Occupancy of H44K is Constrained at    | 0.33   | Check  |
| PLAT301_ALERT_3_G | Main Residue Disorder .....(Resd 1) ..           | 2      | % Note |
| PLAT779_ALERT_4_G | Suspect or Irrelevant (Bond) Angle in CIF .... # | 96     | Check  |
|                   | C444 -C441 -C443 1.555 1.555 1.555               | 44.10  | Deg.   |
| PLAT860_ALERT_3_G | Number of Least-Squares Restraints .....         | 1      | Note   |
| PLAT899_ALERT_4_G | SHELXL97 is Deprecated and Succeeded by SHELXL   | 2014   | Note   |

---

- 0 **ALERT level A** = Most likely a serious problem - resolve or explain  
2 **ALERT level B** = A potentially serious problem, consider carefully  
11 **ALERT level C** = Check. Ensure it is not caused by an omission or oversight  
17 **ALERT level G** = General information/check it is not something unexpected

- 3 ALERT type 1 CIF construction/syntax error, inconsistent or missing data  
10 ALERT type 2 Indicator that the structure model may be wrong or deficient  
3 ALERT type 3 Indicator that the structure quality may be low  
13 ALERT type 4 Improvement, methodology, query or suggestion  
1 ALERT type 5 Informative message, check
- 
-

It is advisable to attempt to resolve as many as possible of the alerts in all categories. Often the minor alerts point to easily fixed oversights, errors and omissions in your CIF or refinement strategy, so attention to these fine details can be worthwhile. In order to resolve some of the more serious problems it may be necessary to carry out additional measurements or structure refinements. However, the purpose of your study may justify the reported deviations and the more serious of these should normally be commented upon in the discussion or experimental section of a paper or in the "special\_details" fields of the CIF. checkCIF was carefully designed to identify outliers and unusual parameters, but every test has its limitations and alerts that are not important in a particular case may appear. Conversely, the absence of alerts does not guarantee there are no aspects of the results needing attention. It is up to the individual to critically assess their own results and, if necessary, seek expert advice.

### **Publication of your CIF in IUCr journals**

A basic structural check has been run on your CIF. These basic checks will be run on all CIFs submitted for publication in IUCr journals (*Acta Crystallographica*, *Journal of Applied Crystallography*, *Journal of Synchrotron Radiation*); however, if you intend to submit to *Acta Crystallographica Section C* or *E* or *IUCrData*, you should make sure that full publication checks are run on the final version of your CIF prior to submission.

### **Publication of your CIF in other journals**

Please refer to the *Notes for Authors* of the relevant journal for any special instructions relating to CIF submission.

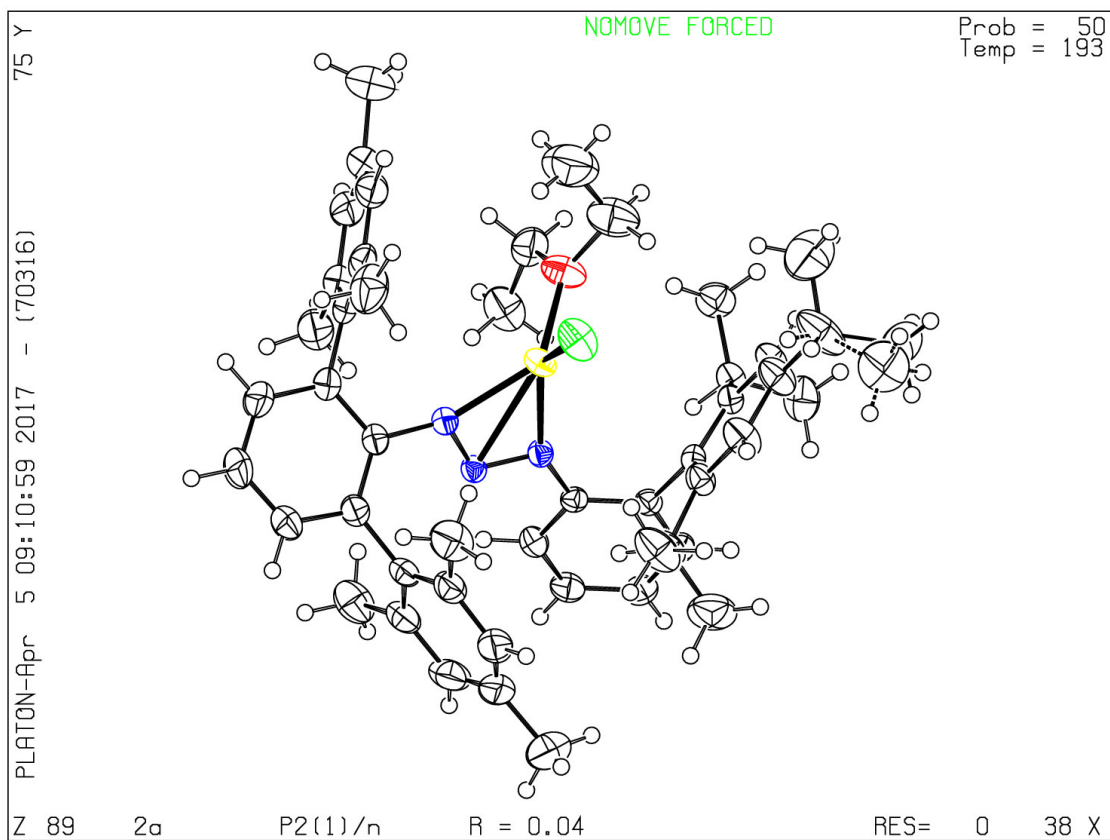

# checkCIF/PLATON report

You have not supplied any structure factors. As a result the full set of tests cannot be run.

THIS REPORT IS FOR GUIDANCE ONLY. IF USED AS PART OF A REVIEW PROCEDURE FOR PUBLICATION, IT SHOULD NOT REPLACE THE EXPERTISE OF AN EXPERIENCED CRYSTALLOGRAPHIC REFEREE.

No syntax errors found.      CIF dictionary      Interpreting this report

## Datablock: 2b

---

|                 |                   |                                |
|-----------------|-------------------|--------------------------------|
| Bond precision: | C-C = 0.0038 A    | Wavelength=0.71073             |
| Cell:           | a=19.848 (4)      | b=9.373 (2)      c=23.033 (4)  |
|                 | alpha=90          | beta=90.386 (14)      gamma=90 |
| Temperature:    | 173 K             |                                |
|                 | Calculated        | Reported                       |
| Volume          | 4284.9 (15)       | 4284.9 (14)                    |
| Space group     | P 21/c            | P2 (1) /c                      |
| Hall group      | -P 2ybc           | ?                              |
| Moiety formula  | C48 H52 I Mg N3 O | ?                              |
| Sum formula     | C48 H52 I Mg N3 O | C48 H52 I Mg N3 O              |
| Mr              | 838.14            | 838.14                         |
| Dx, g cm-3      | 1.299             | 1.299                          |
| Z               | 4                 | 4                              |
| Mu (mm-1)       | 0.800             | 0.800                          |
| F000            | 1736.0            | 1736.0                         |
| F000'           | 1734.78           |                                |
| h, k, lmax      | 25, 12, 29        | 25, 12, 29                     |
| Nref            | 9842              | 9823                           |
| Tmin, Tmax      | 0.722, 0.819      | 0.533, 0.740                   |
| Tmin'           | 0.664             |                                |

Correction method= # Reported T Limits: Tmin=0.533 Tmax=0.740  
AbsCorr = PSI-SCAN

Data completeness= 0.998      Theta (max)= 27.500

R(reflections)= 0.0359 ( 6945)      wR2(reflections)= 0.0897 ( 9823)

S = 0.886      Npar= 501

---

The following ALERTS were generated. Each ALERT has the format

**test-name\_ALERT\_alert-type\_alert-level.**

Click on the hyperlinks for more details of the test.

---

### Alert level C

ABSTY02\_ALERT\_1\_C An \_exptl\_absorpt\_correction\_type has been given without  
a literature citation. This should be contained in the  
\_exptl\_absorpt\_process\_details field.  
Absorption correction given as psi-scan

---

### Alert level G

|                                                                    |             |
|--------------------------------------------------------------------|-------------|
| PLAT005_ALERT_5_G No Embedded Refinement Details found in the CIF  | Please Do ! |
| PLAT093_ALERT_1_G No s.u.'s on H-positions, Refinement Reported as | mixed Check |
| PLAT899_ALERT_4_G SHELXL97 is Deprecated and Succeeded by SHELXL   | 2014 Note   |

---

- 
- 0 **ALERT level A** = Most likely a serious problem - resolve or explain  
0 **ALERT level B** = A potentially serious problem, consider carefully  
1 **ALERT level C** = Check. Ensure it is not caused by an omission or oversight  
3 **ALERT level G** = General information/check it is not something unexpected
- 2 ALERT type 1 CIF construction/syntax error, inconsistent or missing data  
0 ALERT type 2 Indicator that the structure model may be wrong or deficient  
0 ALERT type 3 Indicator that the structure quality may be low  
1 ALERT type 4 Improvement, methodology, query or suggestion  
1 ALERT type 5 Informative message, check
- 

It is advisable to attempt to resolve as many as possible of the alerts in all categories. Often the minor alerts point to easily fixed oversights, errors and omissions in your CIF or refinement strategy, so attention to these fine details can be worthwhile. In order to resolve some of the more serious problems it may be necessary to carry out additional measurements or structure refinements. However, the purpose of your study may justify the reported deviations and the more serious of these should normally be commented upon in the discussion or experimental section of a paper or in the "special\_details" fields of the CIF. checkCIF was carefully designed to identify outliers and unusual parameters, but every test has its limitations and alerts that are not important in a particular case may appear. Conversely, the absence of alerts does not guarantee there are no aspects of the results needing attention. It is up to the individual to critically assess their own results and, if necessary, seek expert advice.

### Publication of your CIF in IUCr journals

A basic structural check has been run on your CIF. These basic checks will be run on all CIFs submitted for publication in IUCr journals (*Acta Crystallographica*, *Journal of Applied Crystallography*, *Journal of Synchrotron Radiation*); however, if you intend to submit to *Acta Crystallographica Section C* or *E* or *IUCrData*, you should make sure that full publication checks are run on the final version of your CIF prior to submission.

### Publication of your CIF in other journals

Please refer to the *Notes for Authors* of the relevant journal for any special instructions relating to CIF submission.

---

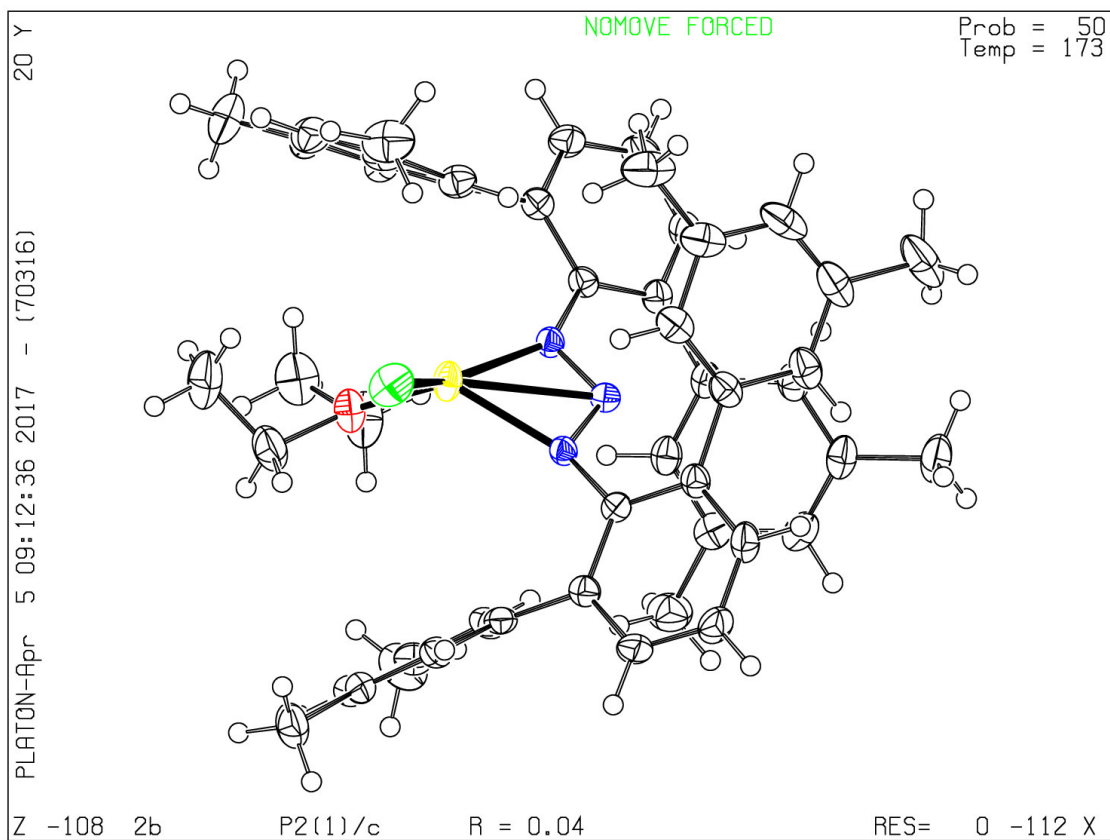

# checkCIF/PLATON report

You have not supplied any structure factors. As a result the full set of tests cannot be run.

THIS REPORT IS FOR GUIDANCE ONLY. IF USED AS PART OF A REVIEW PROCEDURE FOR PUBLICATION, IT SHOULD NOT REPLACE THE EXPERTISE OF AN EXPERIENCED CRYSTALLOGRAPHIC REFEREE.

No syntax errors found.      CIF dictionary      Interpreting this report

## Datablock: 3a

---

Bond precision:    C-C = 0.0088 Å                      Wavelength=0.71073

Cell:                      a=20.4142 (4)              b=22.2202 (4)              c=39.3523 (7)  
                            alpha=90                      beta=90                      gamma=90  
Temperature:              173 K

|                        | Calculated         | Reported           |
|------------------------|--------------------|--------------------|
| Volume                 | 17850.5 (6)        | 17850.5 (6)        |
| Space group            | P b c a            | Pbca               |
| Hall group             | -P 2ac 2ab         | ?                  |
| Moiety formula         | C90 H104 I4 Mg3 N6 | ?                  |
| Sum formula            | C90 H104 I4 Mg3 N6 | C90 H104 I4 Mg3 N6 |
| Mr                     | 1850.33            | 1850.32            |
| Dx, g cm <sup>-3</sup> | 1.377              | 1.377              |
| Z                      | 8                  | 8                  |
| Mu (mm <sup>-1</sup> ) | 1.462              | 1.462              |
| F000                   | 7472.0             | 7472.0             |
| F000'                  | 7459.72            |                    |
| h, k, lmax             | 26, 29, 51         | 26, 29, 51         |
| Nref                   | 21349              | 21302              |
| Tmin, Tmax             | 0.711, 0.803       | 0.426, 0.517       |
| Tmin'                  | 0.639              |                    |

Correction method= # Reported T Limits: Tmin=0.426 Tmax=0.517  
AbsCorr = MULTII-SCAN

Data completeness= 0.998                      Theta(max)= 27.910

R(reflections)= 0.0411 ( 6128)              wR2(reflections)= 0.0665 ( 21302)

S = 0.653                      Npar= 952

---

The following ALERTS were generated. Each ALERT has the format  
**test-name\_ALERT\_alert-type\_alert-level.**  
Click on the hyperlinks for more details of the test.



---

### Alert level A

RINTA01\_ALERT\_3\_A The value of Rint is greater than 0.25

Rint given 0.254

PLAT026\_ALERT\_3\_A Ratio Observed / Unique Reflections (too) Low .. 29 %

---

### Alert level B

PLAT213\_ALERT\_2\_B Atom C110 has ADP max/min Ratio ..... 4.3 prolat

PLAT220\_ALERT\_2\_B Non-Solvent Resd 1 C Ueq(max)/Ueq(min) Range 6.3 Ratio

---

### Alert level C

ABSTY02\_ALERT\_1\_C An \_exptl\_absorpt\_correction\_type has been given without  
a literature citation. This should be contained in the  
\_exptl\_absorpt\_process\_details field.

Absorption correction given as multi-scan

GOODF01\_ALERT\_2\_C The least squares goodness of fit parameter lies  
outside the range 0.80 <> 2.00

Goodness of fit given = 0.653

PLAT213\_ALERT\_2\_C Atom C64 has ADP max/min Ratio ..... 3.8 prolat

PLAT213\_ALERT\_2\_C Atom C112 has ADP max/min Ratio ..... 3.1 prolat

PLAT222\_ALERT\_3\_C Non-Solvent Resd 1 H Uiso(max)/Uiso(min) Range 5.9 Ratio

PLAT234\_ALERT\_4\_C Large Hirshfeld Difference C32 -- C33 .. 0.17 Ang.

PLAT234\_ALERT\_4\_C Large Hirshfeld Difference C110 -- C111 .. 0.18 Ang.

PLAT241\_ALERT\_2\_C High 'MainMol' Ueq as Compared to Neighbors of I1 Check

PLAT241\_ALERT\_2\_C High 'MainMol' Ueq as Compared to Neighbors of C64 Check

PLAT241\_ALERT\_2\_C High 'MainMol' Ueq as Compared to Neighbors of C110 Check

PLAT242\_ALERT\_2\_C Low 'MainMol' Ueq as Compared to Neighbors of C104 Check

PLAT242\_ALERT\_2\_C Low 'MainMol' Ueq as Compared to Neighbors of C107 Check

PLAT242\_ALERT\_2\_C Low 'MainMol' Ueq as Compared to Neighbors of C541 Check

PLAT242\_ALERT\_2\_C Low 'MainMol' Ueq as Compared to Neighbors of C561 Check

PLAT342\_ALERT\_3\_C Low Bond Precision on C-C Bonds ..... 0.00881 Ang.

PLAT360\_ALERT\_2\_C Short C(sp3)-C(sp3) Bond C110 - C111 .. 1.37 Ang.

PLAT360\_ALERT\_2\_C Short C(sp3)-C(sp3) Bond C110 - C112 .. 1.37 Ang.

---

### Alert level G

PLAT005\_ALERT\_5\_G No Embedded Refinement Details found in the CIF Please Do !

PLAT020\_ALERT\_3\_G The value of Rint is greater than 0.12 ..... 0.254 Report

PLAT093\_ALERT\_1\_G No s.u.'s on H-positions, Refinement Reported as mixed Check

PLAT343\_ALERT\_2\_G Unusual sp3 Angle Range in Main Residue for C110 Check

PLAT380\_ALERT\_4\_G Incorrectly? Oriented X(sp2)-Methyl Moiety ..... C721 Check

PLAT380\_ALERT\_4\_G Incorrectly? Oriented X(sp2)-Methyl Moiety ..... C841 Check

PLAT899\_ALERT\_4\_G SHELXL97 is Deprecated and Succeeded by SHELXL 2014 Note

---

2 **ALERT level A** = Most likely a serious problem - resolve or explain

2 **ALERT level B** = A potentially serious problem, consider carefully

17 **ALERT level C** = Check. Ensure it is not caused by an omission or oversight

7 **ALERT level G** = General information/check it is not something unexpected

2 ALERT type 1 CIF construction/syntax error, inconsistent or missing data

15 ALERT type 2 Indicator that the structure model may be wrong or deficient

5 ALERT type 3 Indicator that the structure quality may be low

5 ALERT type 4 Improvement, methodology, query or suggestion

1 ALERT type 5 Informative message, check

---

It is advisable to attempt to resolve as many as possible of the alerts in all categories. Often the minor alerts point to easily fixed oversights, errors and omissions in your CIF or refinement strategy, so attention to these fine details can be worthwhile. In order to resolve some of the more serious problems it may be necessary to carry out additional measurements or structure refinements. However, the purpose of your study may justify the reported deviations and the more serious of these should normally be commented upon in the discussion or experimental section of a paper or in the "special\_details" fields of the CIF. checkCIF was carefully designed to identify outliers and unusual parameters, but every test has its limitations and alerts that are not important in a particular case may appear. Conversely, the absence of alerts does not guarantee there are no aspects of the results needing attention. It is up to the individual to critically assess their own results and, if necessary, seek expert advice.

### **Publication of your CIF in IUCr journals**

A basic structural check has been run on your CIF. These basic checks will be run on all CIFs submitted for publication in IUCr journals (*Acta Crystallographica*, *Journal of Applied Crystallography*, *Journal of Synchrotron Radiation*); however, if you intend to submit to *Acta Crystallographica Section C* or *E* or *IUCrData*, you should make sure that full publication checks are run on the final version of your CIF prior to submission.

### **Publication of your CIF in other journals**

Please refer to the *Notes for Authors* of the relevant journal for any special instructions relating to CIF submission.

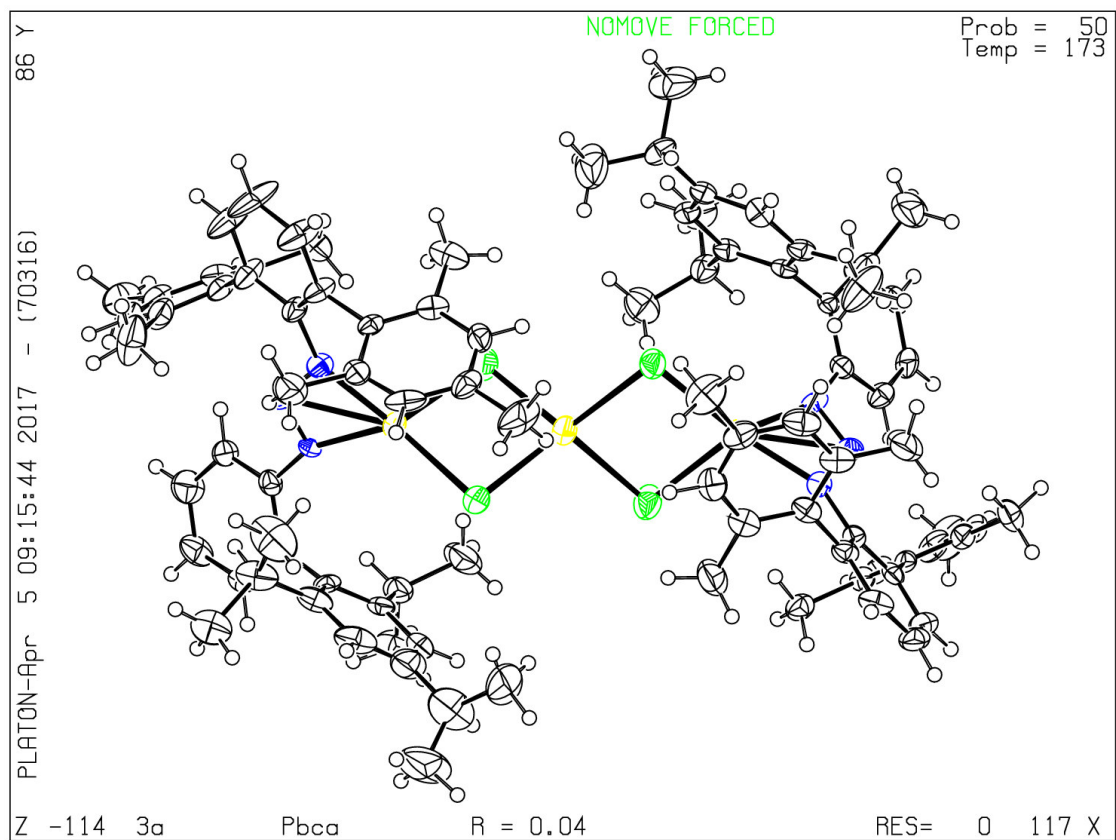

# checkCIF/PLATON report

You have not supplied any structure factors. As a result the full set of tests cannot be run.

THIS REPORT IS FOR GUIDANCE ONLY. IF USED AS PART OF A REVIEW PROCEDURE FOR PUBLICATION, IT SHOULD NOT REPLACE THE EXPERTISE OF AN EXPERIENCED CRYSTALLOGRAPHIC REFEREE.

No syntax errors found.      CIF dictionary      Interpreting this report

## Datablock: 3bheptane

---

Bond precision:    C-C = 0.0071 Å

Wavelength=0.71073

Cell:                a=16.9933(5)                b=17.5771(5)                c=17.8005(5)  
                      alpha=93.427(2)        beta=99.534(2)        gamma=109.991(2)  
Temperature:        173 K

|                        | Calculated        | Reported          |
|------------------------|-------------------|-------------------|
| Volume                 | 4888.5(3)         | 4888.5(2)         |
| Space group            | P -1              | P-1               |
| Hall group             | -P 1              | ?                 |
| Moiety formula         | C88 H84 I4 Mg3 N6 | ?                 |
| Sum formula            | C88 H84 I4 Mg3 N6 | C88 H84 I4 Mg3 N6 |
| Mr                     | 1806.15           | 1806.14           |
| Dx, g cm <sup>-3</sup> | 1.227             | 1.227             |
| Z                      | 2                 | 2                 |
| Mu (mm <sup>-1</sup> ) | 1.334             | 1.334             |
| F000                   | 1804.0            | 1804.0            |
| F000'                  | 1800.93           |                   |
| h, k, lmax             | 23, 24, 24        | 23, 24, 24        |
| Nref                   | 27392             | 27255             |
| Tmin, Tmax             | 0.577, 0.766      | 0.565, 0.823      |
| Tmin'                  | 0.543             |                   |

Correction method= # Reported T Limits: Tmin=0.565 Tmax=0.823  
AbsCorr = MULTISCAN

Data completeness= 0.995

Theta(max)= 29.550

R(reflections)= 0.0674( 21930)

wR2(reflections)= 0.1344( 27255)

S = 1.921

Npar= 926

---

The following ALERTS were generated. Each ALERT has the format

**test-name\_ALERT\_alert-type\_alert-level.**

Click on the hyperlinks for more details of the test.

---

**Alert level A**

PLAT213\_ALERT\_2\_A Atom C25 has ADP max/min Ratio ..... 7.8 prolat  
PLAT602\_ALERT\_2\_A VERY LARGE Solvent Accessible VOID(S) in Structure ! Info

---

**Alert level B**

PLAT213\_ALERT\_2\_B Atom C24 has ADP max/min Ratio ..... 4.2 prolat  
PLAT213\_ALERT\_2\_B Atom C251 has ADP max/min Ratio ..... 4.9 prolat  
PLAT220\_ALERT\_2\_B Non-Solvent Resd 1 C Ueq(max)/Ueq(min) Range 10.0 Ratio  
PLAT230\_ALERT\_2\_B Hirshfeld Test Diff for C25 -- C26 .. 7.8 s.u.  
PLAT241\_ALERT\_2\_B High 'MainMol' Ueq as Compared to Neighbors of C24 Check

---

**Alert level C**

ABSTY02\_ALERT\_1\_C An \_exptl\_absorpt\_correction\_type has been given without  
a literature citation. This should be contained in the  
\_exptl\_absorpt\_process\_details field.

Absorption correction given as multi-scan

PLAT213\_ALERT\_2\_C Atom C23 has ADP max/min Ratio ..... 3.4 prolat  
PLAT213\_ALERT\_2\_C Atom C64 has ADP max/min Ratio ..... 3.4 prolat  
PLAT213\_ALERT\_2\_C Atom C231 has ADP max/min Ratio ..... 3.1 prolat  
PLAT213\_ALERT\_2\_C Atom C651 has ADP max/min Ratio ..... 3.3 prolat  
PLAT222\_ALERT\_3\_C Non-Solvent Resd 1 H Uiso(max)/Uiso(min) Range 10.0 Ratio  
PLAT230\_ALERT\_2\_C Hirshfeld Test Diff for C24 -- C25 .. 7.0 s.u.  
PLAT230\_ALERT\_2\_C Hirshfeld Test Diff for C113 -- C117 .. 5.2 s.u.  
PLAT234\_ALERT\_4\_C Large Hirshfeld Difference C21 -- C26 .. 0.17 Ang.  
PLAT234\_ALERT\_4\_C Large Hirshfeld Difference C25 -- C251 .. 0.20 Ang.  
PLAT241\_ALERT\_2\_C High 'MainMol' Ueq as Compared to Neighbors of C64 Check  
PLAT242\_ALERT\_2\_C Low 'MainMol' Ueq as Compared to Neighbors of C21 Check  
PLAT242\_ALERT\_2\_C Low 'MainMol' Ueq as Compared to Neighbors of C22 Check  
PLAT242\_ALERT\_2\_C Low 'MainMol' Ueq as Compared to Neighbors of C23 Check  
PLAT242\_ALERT\_2\_C Low 'MainMol' Ueq as Compared to Neighbors of C25 Check  
PLAT242\_ALERT\_2\_C Low 'MainMol' Ueq as Compared to Neighbors of C65 Check

---

**Alert level G**

PLAT005\_ALERT\_5\_G No Embedded Refinement Details found in the CIF Please Do !  
PLAT093\_ALERT\_1\_G No s.u.'s on H-positions, Refinement Reported as mixed Check  
PLAT154\_ALERT\_1\_G The s.u.'s on the Cell Angles are Equal ..(Note) 0.002 Degree  
PLAT232\_ALERT\_2\_G Hirshfeld Test Diff (M-X) I4 -- Mg2 .. 5.2 s.u.  
PLAT335\_ALERT\_2\_G Check Large C6 Ring C-C Range C21 -C26 0.22 Ang.  
PLAT710\_ALERT\_4\_G Delete 1-2-3 or 2-3-4 Linear Torsion Angle ... # 3 Do !  
N2 -MG1 -MG2 -I1 67.40 0.70 1.555 1.555 1.555 1.555  
PLAT710\_ALERT\_4\_G Delete 1-2-3 or 2-3-4 Linear Torsion Angle ... # 7 Do !  
N2 -MG1 -MG2 -I2 -113.50 0.70 1.555 1.555 1.555 1.555  
PLAT710\_ALERT\_4\_G Delete 1-2-3 or 2-3-4 Linear Torsion Angle ... # 11 Do !  
N2 -MG1 -MG2 -I4 -20.70 0.70 1.555 1.555 1.555 1.555  
PLAT710\_ALERT\_4\_G Delete 1-2-3 or 2-3-4 Linear Torsion Angle ... # 16 Do !  
N2 -MG1 -MG2 -I3 156.50 0.60 1.555 1.555 1.555 1.555  
PLAT710\_ALERT\_4\_G Delete 1-2-3 or 2-3-4 Linear Torsion Angle ... # 19 Do !  
N3 -MG1 -MG2 -MG3 18.00 0.00 1.555 1.555 1.555 1.555  
PLAT710\_ALERT\_4\_G Delete 1-2-3 or 2-3-4 Linear Torsion Angle ... # 20 Do !  
N1 -MG1 -MG2 -MG3 -25.00 4.00 1.555 1.555 1.555 1.555  
PLAT710\_ALERT\_4\_G Delete 1-2-3 or 2-3-4 Linear Torsion Angle ... # 21 Do !  
N2 -MG1 -MG2 -MG3 -89.00 3.00 1.555 1.555 1.555 1.555  
PLAT710\_ALERT\_4\_G Delete 1-2-3 or 2-3-4 Linear Torsion Angle ... # 22 Do !  
I2 -MG1 -MG2 -MG3 24.00 3.00 1.555 1.555 1.555 1.555  
PLAT710\_ALERT\_4\_G Delete 1-2-3 or 2-3-4 Linear Torsion Angle ... # 23 Do !  
I1 -MG1 -MG2 -MG3 -157.00 3.00 1.555 1.555 1.555 1.555  
PLAT710\_ALERT\_4\_G Delete 1-2-3 or 2-3-4 Linear Torsion Angle ... # 28 Do !  
MG1 -MG2 -MG3 -N4 -43.00 4.00 1.555 1.555 1.555 1.555

```

PLAT710_ALERT_4_G Delete 1-2-3 or 2-3-4 Linear Torsion Angle ... #      33 Do !
      MG1 -MG2 -MG3 -N6      127.00  3.00  1.555  1.555  1.555  1.555
PLAT710_ALERT_4_G Delete 1-2-3 or 2-3-4 Linear Torsion Angle ... #      38 Do !
      MG1 -MG2 -MG3 -N5      109.00  3.00  1.555  1.555  1.555  1.555
PLAT710_ALERT_4_G Delete 1-2-3 or 2-3-4 Linear Torsion Angle ... #      42 Do !
      MG1 -MG2 -MG3 -I3     -115.00  3.00  1.555  1.555  1.555  1.555
PLAT710_ALERT_4_G Delete 1-2-3 or 2-3-4 Linear Torsion Angle ... #      46 Do !
      MG1 -MG2 -MG3 -I4       69.00  3.00  1.555  1.555  1.555  1.555
PLAT710_ALERT_4_G Delete 1-2-3 or 2-3-4 Linear Torsion Angle ... #      94 Do !
      MG2 -MG1 -N2  -N3     -104.10  0.70  1.555  1.555  1.555  1.555
PLAT710_ALERT_4_G Delete 1-2-3 or 2-3-4 Linear Torsion Angle ... #      98 Do !
      MG2 -MG1 -N2  -N1       75.10  0.70  1.555  1.555  1.555  1.555
PLAT899_ALERT_4_G SHELXL97 is Deprecated and Succeeded by SHELXL      2014 Note

```

---

```

 2 ALERT level A = Most likely a serious problem - resolve or explain
 5 ALERT level B = A potentially serious problem, consider carefully
16 ALERT level C = Check. Ensure it is not caused by an omission or oversight
22 ALERT level G = General information/check it is not something unexpected

 3 ALERT type 1 CIF construction/syntax error, inconsistent or missing data
21 ALERT type 2 Indicator that the structure model may be wrong or deficient
 1 ALERT type 3 Indicator that the structure quality may be low
19 ALERT type 4 Improvement, methodology, query or suggestion
 1 ALERT type 5 Informative message, check

```

---

It is advisable to attempt to resolve as many as possible of the alerts in all categories. Often the minor alerts point to easily fixed oversights, errors and omissions in your CIF or refinement strategy, so attention to these fine details can be worthwhile. In order to resolve some of the more serious problems it may be necessary to carry out additional measurements or structure refinements. However, the purpose of your study may justify the reported deviations and the more serious of these should normally be commented upon in the discussion or experimental section of a paper or in the "special\_details" fields of the CIF. checkCIF was carefully designed to identify outliers and unusual parameters, but every test has its limitations and alerts that are not important in a particular case may appear. Conversely, the absence of alerts does not guarantee there are no aspects of the results needing attention. It is up to the individual to critically assess their own results and, if necessary, seek expert advice.

### Publication of your CIF in IUCr journals

A basic structural check has been run on your CIF. These basic checks will be run on all CIFs submitted for publication in IUCr journals (*Acta Crystallographica*, *Journal of Applied Crystallography*, *Journal of Synchrotron Radiation*); however, if you intend to submit to *Acta Crystallographica Section C* or *E* or *IUCrData*, you should make sure that full publication checks are run on the final version of your CIF prior to submission.

### Publication of your CIF in other journals

Please refer to the *Notes for Authors* of the relevant journal for any special instructions relating to CIF submission.

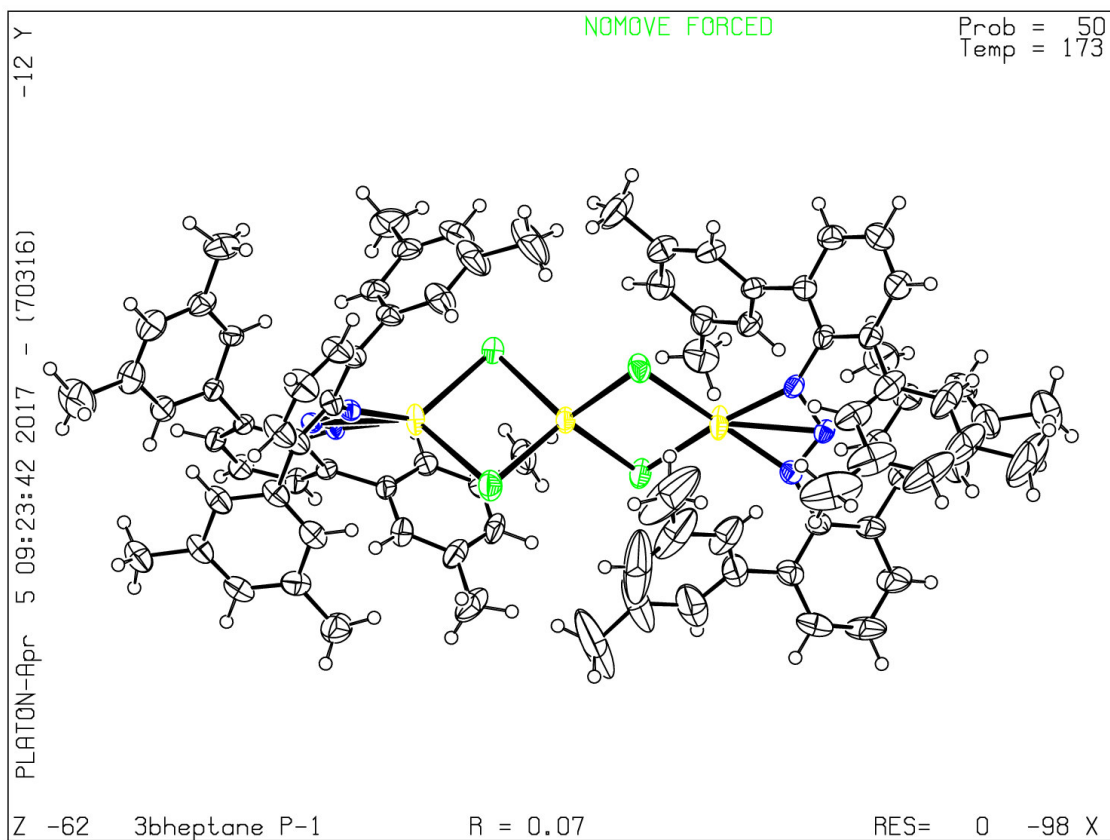

# checkCIF/PLATON report

You have not supplied any structure factors. As a result the full set of tests cannot be run.

THIS REPORT IS FOR GUIDANCE ONLY. IF USED AS PART OF A REVIEW PROCEDURE FOR PUBLICATION, IT SHOULD NOT REPLACE THE EXPERTISE OF AN EXPERIENCED CRYSTALLOGRAPHIC REFEREE.

No syntax errors found.      CIF dictionary      Interpreting this report

## Datablock: 4bheptane

---

|                        |                       |                      |                |
|------------------------|-----------------------|----------------------|----------------|
| Bond precision:        | C-C = 0.0042 Å        | Wavelength=0.71073   |                |
| Cell:                  | a=15.0589 (12)        | b=13.0937 (10)       | c=20.3232 (16) |
|                        | alpha=90              | beta=99.013 (3)      | gamma=90       |
| Temperature:           | 173 K                 |                      |                |
|                        | Calculated            | Reported             |                |
| Volume                 | 3957.8 (5)            | 3957.8 (5)           |                |
| Space group            | P 2/n                 | P2/n                 |                |
| Hall group             | -P 2yac               | ?                    |                |
| Moiety formula         | C88 H84 Mg N6, C7 H16 | ?                    |                |
| Sum formula            | C95 H100 Mg N6        | C47.50 H50 Mg0.50 N3 |                |
| Mr                     | 1350.12               | 675.06               |                |
| Dx, g cm <sup>-3</sup> | 1.133                 | 1.133                |                |
| Z                      | 2                     | 4                    |                |
| Mu (mm <sup>-1</sup> ) | 0.073                 | 0.073                |                |
| F000                   | 1448.0                | 1448.0               |                |
| F000'                  | 1448.54               |                      |                |
| h, k, lmax             | 19, 17, 26            | 19, 17, 26           |                |
| Nref                   | 9097                  | 9087                 |                |
| Tmin, Tmax             | 0.978, 0.986          |                      |                |
| Tmin'                  | 0.975                 |                      |                |

Correction method= Not given

Data completeness= 0.999      Theta(max)= 27.500

R(reflections)= 0.0665 ( 3669)      wR2(reflections)= 0.1882 ( 9087)

S = 0.885      Npar= 464

---

The following ALERTS were generated. Each ALERT has the format  
**test-name\_ALERT\_alert-type\_alert-level.**  
Click on the hyperlinks for more details of the test.

---



## 🟡 Alert level B

RINTA01\_ALERT\_3\_B The value of Rint is greater than 0.18

Rint given 0.248

---

## 🟢 Alert level C

|                   |                                                     |              |
|-------------------|-----------------------------------------------------|--------------|
| PLAT026_ALERT_3_C | Ratio Observed / Unique Reflections (too) Low ..    | 40 %         |
| PLAT202_ALERT_3_C | Isotropic non-H Atoms in Anion/Solvent .....        | 1 Check      |
| PLAT230_ALERT_2_C | Hirshfeld Test Diff for N1 -- N2 ..                 | 6.0 s.u.     |
| PLAT243_ALERT_4_C | High 'Solvent' Ueq as Compared to Neighbors of C204 | Check        |
| PLAT340_ALERT_3_C | Low Bond Precision on C-C Bonds .....               | 0.00421 Ang. |
| PLAT413_ALERT_2_C | Short Inter XH3 .. XHn H65B .. H65B ..              | 2.09 Ang.    |

---

## 🟠 Alert level G

|                   |                                                  |              |
|-------------------|--------------------------------------------------|--------------|
| PLAT002_ALERT_2_G | Number of Distance or Angle Restraints on AtSite | 7 Note       |
| PLAT005_ALERT_5_G | No Embedded Refinement Details found in the CIF  | Please Do !  |
| PLAT020_ALERT_3_G | The value of Rint is greater than 0.12 .....     | 0.248 Report |
| PLAT045_ALERT_1_G | Calculated and Reported Z Differ by a Factor ... | 0.50 Check   |
| PLAT093_ALERT_1_G | No s.u.'s on H-positions, Refinement Reported as | mixed Check  |
| PLAT300_ALERT_4_G | Atom Site Occupancy of C201 is Constrained at    | 0.5 Check    |
| PLAT300_ALERT_4_G | Atom Site Occupancy of C202 is Constrained at    | 0.5 Check    |
| PLAT300_ALERT_4_G | Atom Site Occupancy of C203 is Constrained at    | 0.5 Check    |
| PLAT300_ALERT_4_G | Atom Site Occupancy of C301 is Constrained at    | 0.5 Check    |
| PLAT300_ALERT_4_G | Atom Site Occupancy of C302 is Constrained at    | 0.5 Check    |
| PLAT300_ALERT_4_G | Atom Site Occupancy of C303 is Constrained at    | 0.5 Check    |
| PLAT300_ALERT_4_G | Atom Site Occupancy of H20A is Constrained at    | 0.5 Check    |
| PLAT300_ALERT_4_G | Atom Site Occupancy of H20B is Constrained at    | 0.5 Check    |
| PLAT300_ALERT_4_G | Atom Site Occupancy of H20C is Constrained at    | 0.5 Check    |
| PLAT300_ALERT_4_G | Atom Site Occupancy of H20D is Constrained at    | 0.5 Check    |
| PLAT300_ALERT_4_G | Atom Site Occupancy of H20E is Constrained at    | 0.5 Check    |
| PLAT300_ALERT_4_G | Atom Site Occupancy of H20F is Constrained at    | 0.5 Check    |
| PLAT300_ALERT_4_G | Atom Site Occupancy of H20G is Constrained at    | 0.5 Check    |
| PLAT300_ALERT_4_G | Atom Site Occupancy of H20H is Constrained at    | 0.5 Check    |
| PLAT300_ALERT_4_G | Atom Site Occupancy of H20I is Constrained at    | 0.5 Check    |
| PLAT300_ALERT_4_G | Atom Site Occupancy of H30A is Constrained at    | 0.5 Check    |
| PLAT300_ALERT_4_G | Atom Site Occupancy of H30B is Constrained at    | 0.5 Check    |
| PLAT300_ALERT_4_G | Atom Site Occupancy of H30C is Constrained at    | 0.5 Check    |
| PLAT300_ALERT_4_G | Atom Site Occupancy of H30D is Constrained at    | 0.5 Check    |
| PLAT300_ALERT_4_G | Atom Site Occupancy of H30E is Constrained at    | 0.5 Check    |
| PLAT300_ALERT_4_G | Atom Site Occupancy of H30F is Constrained at    | 0.5 Check    |
| PLAT300_ALERT_4_G | Atom Site Occupancy of H30G is Constrained at    | 0.5 Check    |
| PLAT302_ALERT_4_G | Anion/Solvent/Minor-Residue Disorder (Resd 2) .. | 86 % Note    |
| PLAT779_ALERT_4_G | Suspect or Irrelevant (Bond) Angle in CIF .... # | 100 Check    |
|                   | C303 -C204 -C203 2.554 1.555 2.554               | 43.90 Deg.   |
| PLAT779_ALERT_4_G | Suspect or Irrelevant (Bond) Angle in CIF .... # | 103 Check    |
|                   | C303 -C204 -C203 1.555 1.555 1.555               | 43.90 Deg.   |
| PLAT790_ALERT_4_G | Centre of Gravity not Within Unit Cell: Resd. #  | 2 Note       |
|                   | C7 H16                                           |              |
| PLAT860_ALERT_3_G | Number of Least-Squares Restraints .....         | 8 Note       |
| PLAT899_ALERT_4_G | SHELXL97 is Deprecated and Succeeded by SHELXL   | 2014 Note    |

---

0 **ALERT level A** = Most likely a serious problem - resolve or explain

1 **ALERT level B** = A potentially serious problem, consider carefully

6 **ALERT level C** = Check. Ensure it is not caused by an omission or oversight

33 **ALERT level G** = General information/check it is not something unexpected

2 **ALERT type 1** CIF construction/syntax error, inconsistent or missing data

3 ALERT type 2 Indicator that the structure model may be wrong or deficient  
6 ALERT type 3 Indicator that the structure quality may be low  
28 ALERT type 4 Improvement, methodology, query or suggestion  
1 ALERT type 5 Informative message, check

---

It is advisable to attempt to resolve as many as possible of the alerts in all categories. Often the minor alerts point to easily fixed oversights, errors and omissions in your CIF or refinement strategy, so attention to these fine details can be worthwhile. In order to resolve some of the more serious problems it may be necessary to carry out additional measurements or structure refinements. However, the purpose of your study may justify the reported deviations and the more serious of these should normally be commented upon in the discussion or experimental section of a paper or in the "special\_details" fields of the CIF. checkCIF was carefully designed to identify outliers and unusual parameters, but every test has its limitations and alerts that are not important in a particular case may appear. Conversely, the absence of alerts does not guarantee there are no aspects of the results needing attention. It is up to the individual to critically assess their own results and, if necessary, seek expert advice.

### **Publication of your CIF in IUCr journals**

A basic structural check has been run on your CIF. These basic checks will be run on all CIFs submitted for publication in IUCr journals (*Acta Crystallographica*, *Journal of Applied Crystallography*, *Journal of Synchrotron Radiation*); however, if you intend to submit to *Acta Crystallographica Section C* or *E* or *IUCrData*, you should make sure that full publication checks are run on the final version of your CIF prior to submission.

### **Publication of your CIF in other journals**

Please refer to the *Notes for Authors* of the relevant journal for any special instructions relating to CIF submission.

---

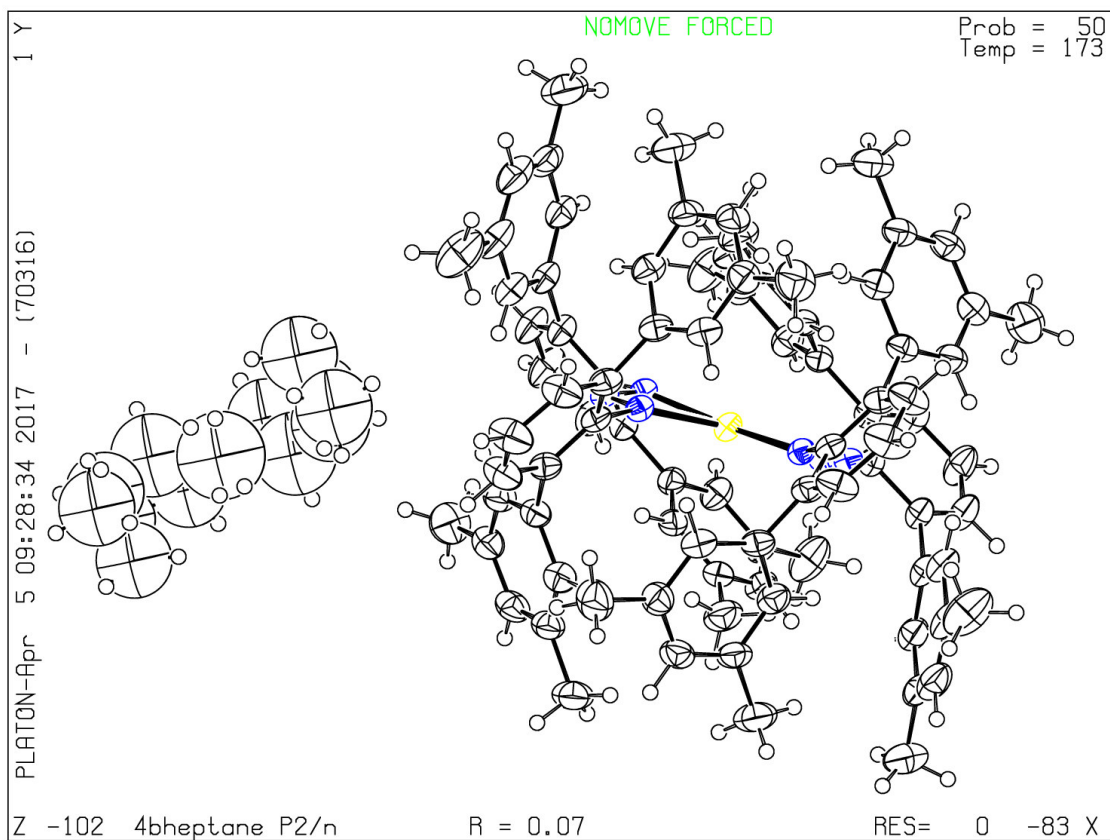

## checkCIF/PLATON report

You have not supplied any structure factors. As a result the full set of tests cannot be run.

THIS REPORT IS FOR GUIDANCE ONLY. IF USED AS PART OF A REVIEW PROCEDURE FOR PUBLICATION, IT SHOULD NOT REPLACE THE EXPERTISE OF AN EXPERIENCED CRYSTALLOGRAPHIC REFEREE.

No syntax errors found.      CIF dictionary      Interpreting this report

### Datablock: 4ctoluene

---

|                                 |                                    |                                 |
|---------------------------------|------------------------------------|---------------------------------|
| Bond precision:                 | C-C = 0.0036 A                     | Wavelength=0.71073              |
| Cell:                           | a=13.302 (2)                       | b=21.531 (3)      c=24.332 (4)  |
|                                 | alpha=90                           | beta=101.877 (12)      gamma=90 |
| Temperature:                    | 173 K                              |                                 |
|                                 | Calculated                         | Reported                        |
| Volume                          | 6819.6 (18)                        | 6819.8 (17)                     |
| Space group                     | P 21/n                             | P2 (1) /n                       |
| Hall group                      | -P 2yn                             | ?                               |
| Moiety formula                  | 2 (C78 H80 Mg N6), C7 H8           | ?                               |
| Sum formula                     | C163 H168 Mg2 N12                  | C81.50 H84 Mg N6                |
| Mr                              | 2343.72                            | 1171.86                         |
| Dx, g cm-3                      | 1.141                              | 1.141                           |
| Z                               | 2                                  | 4                               |
| Mu (mm-1)                       | 0.075                              | 0.075                           |
| F000                            | 2508.0                             | 2508.0                          |
| F000'                           | 2508.96                            |                                 |
| h, k, lmax                      | 15, 25, 28                         | 15, 25, 28                      |
| Nref                            | 12012                              | 11996                           |
| Tmin, Tmax                      | 0.965, 0.978                       |                                 |
| Tmin'                           | 0.963                              |                                 |
| Correction method= Not given    |                                    |                                 |
| Data completeness= 0.999        | Theta (max)= 25.000                |                                 |
| R (reflections)= 0.0435 ( 5484) | wR2 (reflections)= 0.0981 ( 11996) |                                 |
| S = 0.727                       | Npar= 837                          |                                 |

---

The following ALERTS were generated. Each ALERT has the format  
**test-name\_ALERT\_alert-type\_alert-level.**  
Click on the hyperlinks for more details of the test.

---

### ● Alert level C

GOODF01\_ALERT\_2\_C The least squares goodness of fit parameter lies outside the range 0.80 <> 2.00

Goodness of fit given = 0.727

|                   |                                                  |           |
|-------------------|--------------------------------------------------|-----------|
| PLAT026_ALERT_3_C | Ratio Observed / Unique Reflections (too) Low .. | 46 %      |
| PLAT220_ALERT_2_C | Non-Solvent Resd 1 C Ueq(max)/Ueq(min) Range     | 3.9 Ratio |
| PLAT223_ALERT_4_C | Solv./Anion Resd 2 H Ueq(max)/Ueq(min) Range     | 4.2 Ratio |
| PLAT230_ALERT_2_C | Hirshfeld Test Diff for N5 -- N6 ..              | 5.1 s.u.  |
| PLAT230_ALERT_2_C | Hirshfeld Test Diff for C84 -- C85 ..            | 6.0 s.u.  |
| PLAT250_ALERT_2_C | Large U3/U1 Ratio for Average U(i,j) Tensor .... | 3.8 Note  |

---

### ● Alert level G

|                   |                                                  |             |
|-------------------|--------------------------------------------------|-------------|
| PLAT002_ALERT_2_G | Number of Distance or Angle Restraints on AtSite | 4 Note      |
| PLAT005_ALERT_5_G | No Embedded Refinement Details found in the CIF  | Please Do ! |
| PLAT045_ALERT_1_G | Calculated and Reported Z Differ by a Factor ... | 0.50 Check  |
| PLAT300_ALERT_4_G | Atom Site Occupancy of C201 is Constrained at    | 0.5 Check   |
| PLAT300_ALERT_4_G | Atom Site Occupancy of C202 is Constrained at    | 0.5 Check   |
| PLAT300_ALERT_4_G | Atom Site Occupancy of C203 is Constrained at    | 0.5 Check   |
| PLAT300_ALERT_4_G | Atom Site Occupancy of C204 is Constrained at    | 0.5 Check   |
| PLAT300_ALERT_4_G | Atom Site Occupancy of C205 is Constrained at    | 0.5 Check   |
| PLAT300_ALERT_4_G | Atom Site Occupancy of C206 is Constrained at    | 0.5 Check   |
| PLAT300_ALERT_4_G | Atom Site Occupancy of C207 is Constrained at    | 0.5 Check   |
| PLAT300_ALERT_4_G | Atom Site Occupancy of H20A is Constrained at    | 0.5 Check   |
| PLAT300_ALERT_4_G | Atom Site Occupancy of H20B is Constrained at    | 0.5 Check   |
| PLAT300_ALERT_4_G | Atom Site Occupancy of H20C is Constrained at    | 0.5 Check   |
| PLAT300_ALERT_4_G | Atom Site Occupancy of H202 is Constrained at    | 0.5 Check   |
| PLAT300_ALERT_4_G | Atom Site Occupancy of H203 is Constrained at    | 0.5 Check   |
| PLAT300_ALERT_4_G | Atom Site Occupancy of H204 is Constrained at    | 0.5 Check   |
| PLAT300_ALERT_4_G | Atom Site Occupancy of H205 is Constrained at    | 0.5 Check   |
| PLAT300_ALERT_4_G | Atom Site Occupancy of H206 is Constrained at    | 0.5 Check   |
| PLAT302_ALERT_4_G | Anion/Solvent/Minor-Residue Disorder (Resd 2)..  | 100 % Note  |
| PLAT304_ALERT_4_G | Non-Integer Number of Atoms ( 7.50) in Resd. #   | 2 Check     |
| PLAT380_ALERT_4_G | Incorrectly? Oriented X(sp2)-Methyl Moiety ..... | C841 Check  |
| PLAT432_ALERT_2_G | Short Inter X...Y Contact C201 .. C206 ..        | 1.02 Ang.   |
| PLAT432_ALERT_2_G | Short Inter X...Y Contact C201 .. C205 ..        | 1.10 Ang.   |
| PLAT432_ALERT_2_G | Short Inter X...Y Contact C201 .. C201 ..        | 1.39 Ang.   |
| PLAT432_ALERT_2_G | Short Inter X...Y Contact C201 .. C204 ..        | 1.50 Ang.   |
| PLAT432_ALERT_2_G | Short Inter X...Y Contact C201 .. C202 ..        | 1.73 Ang.   |
| PLAT432_ALERT_2_G | Short Inter X...Y Contact C201 .. C203 ..        | 1.78 Ang.   |
| PLAT432_ALERT_2_G | Short Inter X...Y Contact C201 .. C207 ..        | 2.87 Ang.   |
| PLAT432_ALERT_2_G | Short Inter X...Y Contact C202 .. C206 ..        | 0.42 Ang.   |
| PLAT432_ALERT_2_G | Short Inter X...Y Contact C202 .. C205 ..        | 1.50 Ang.   |
| PLAT432_ALERT_2_G | Short Inter X...Y Contact C202 .. C207 ..        | 2.68 Ang.   |
| PLAT432_ALERT_2_G | Short Inter X...Y Contact C202 .. C204 ..        | 2.68 Ang.   |
| PLAT432_ALERT_2_G | Short Inter X...Y Contact C202 .. C202 ..        | 2.82 Ang.   |
| PLAT432_ALERT_2_G | Short Inter X...Y Contact C202 .. C203 ..        | 3.17 Ang.   |
| PLAT432_ALERT_2_G | Short Inter X...Y Contact C203 .. C206 ..        | 1.50 Ang.   |
| PLAT432_ALERT_2_G | Short Inter X...Y Contact C203 .. C207 ..        | 1.77 Ang.   |
| PLAT432_ALERT_2_G | Short Inter X...Y Contact C203 .. C205 ..        | 2.87 Ang.   |
| PLAT432_ALERT_2_G | Short Inter X...Y Contact C204 .. C207 ..        | 0.41 Ang.   |
| PLAT432_ALERT_2_G | Short Inter X...Y Contact C204 .. C206 ..        | 2.28 Ang.   |
| PLAT432_ALERT_2_G | Short Inter X...Y Contact C205 .. C207 ..        | 1.11 Ang.   |
| PLAT432_ALERT_2_G | Short Inter X...Y Contact C205 .. C206 ..        | 2.46 Ang.   |
| PLAT432_ALERT_2_G | Short Inter X...Y Contact C206 .. C206 ..        | 2.00 Ang.   |
| PLAT432_ALERT_2_G | Short Inter X...Y Contact C206 .. C207 ..        | 2.29 Ang.   |
| PLAT860_ALERT_3_G | Number of Least-Squares Restraints .....         | 3 Note      |
| PLAT899_ALERT_4_G | SHELXL97 is Deprecated and Succeeded by SHELXL   | 2014 Note   |

---

0 ALERT level A = Most likely a serious problem - resolve or explain

0 **ALERT level B** = A potentially serious problem, consider carefully  
7 **ALERT level C** = Check. Ensure it is not caused by an omission or oversight  
45 **ALERT level G** = General information/check it is not something unexpected

1 ALERT type 1 CIF construction/syntax error, inconsistent or missing data  
28 ALERT type 2 Indicator that the structure model may be wrong or deficient  
2 ALERT type 3 Indicator that the structure quality may be low  
20 ALERT type 4 Improvement, methodology, query or suggestion  
1 ALERT type 5 Informative message, check

---

It is advisable to attempt to resolve as many as possible of the alerts in all categories. Often the minor alerts point to easily fixed oversights, errors and omissions in your CIF or refinement strategy, so attention to these fine details can be worthwhile. In order to resolve some of the more serious problems it may be necessary to carry out additional measurements or structure refinements. However, the purpose of your study may justify the reported deviations and the more serious of these should normally be commented upon in the discussion or experimental section of a paper or in the "special\_details" fields of the CIF. checkCIF was carefully designed to identify outliers and unusual parameters, but every test has its limitations and alerts that are not important in a particular case may appear. Conversely, the absence of alerts does not guarantee there are no aspects of the results needing attention. It is up to the individual to critically assess their own results and, if necessary, seek expert advice.

### **Publication of your CIF in IUCr journals**

A basic structural check has been run on your CIF. These basic checks will be run on all CIFs submitted for publication in IUCr journals (*Acta Crystallographica*, *Journal of Applied Crystallography*, *Journal of Synchrotron Radiation*); however, if you intend to submit to *Acta Crystallographica Section C* or *E* or *IUCrData*, you should make sure that full publication checks are run on the final version of your CIF prior to submission.

### **Publication of your CIF in other journals**

Please refer to the *Notes for Authors* of the relevant journal for any special instructions relating to CIF submission.

---

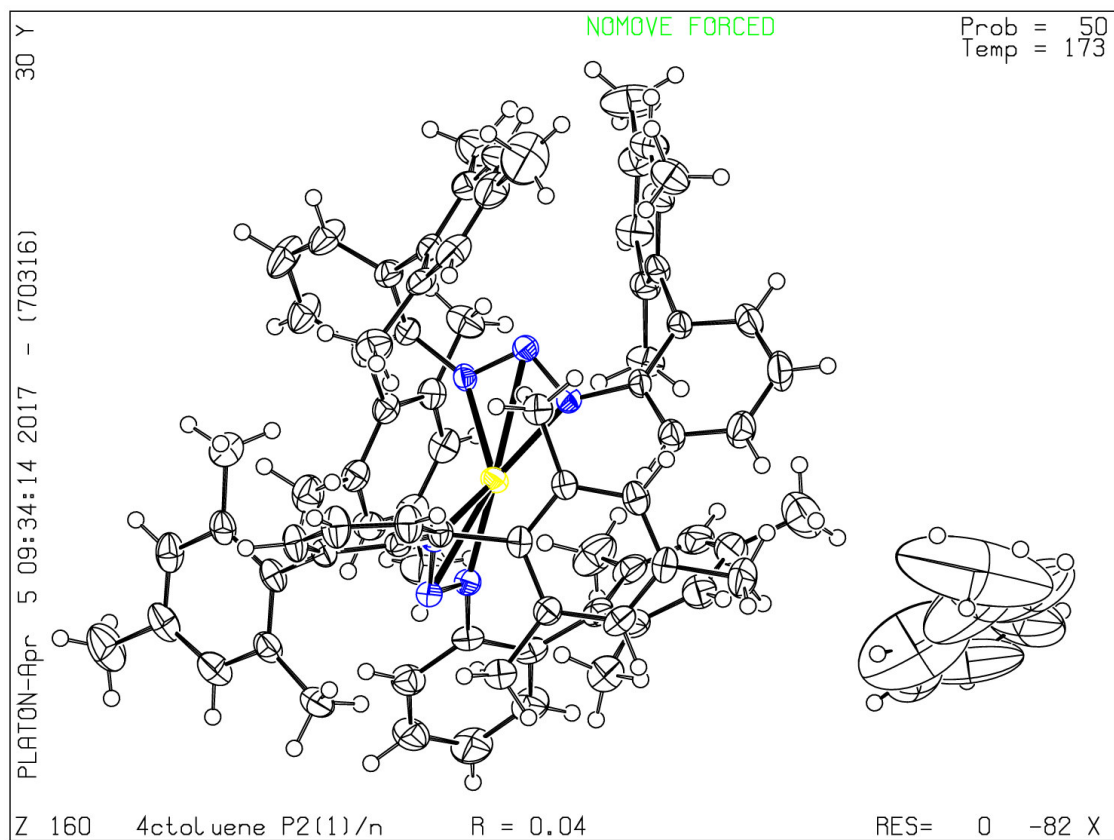

Supplement: s1 [file s1]
