# Supplementary material
Source: MDPI journal article supplement (https://www.mdpi.com/2304-6740/5/2/33)
Supplement: s1 [file s1]

# Supplementary Materials: Hetero- and Homoleptic Magnesium Triazenides

Denis Vinduš and Mark Niemeyer

|                                                                                                                                                                                                                                     |    |
|-------------------------------------------------------------------------------------------------------------------------------------------------------------------------------------------------------------------------------------|----|
| <b>Figure S1.</b> Molecular model of triazenide <b>2a</b> showing magnetically-equivalent methyl groups at 273 K (top) and 373 K (bottom).                                                                                          | S2 |
| <b>Figure S2.</b> VT $^1\text{H}$ NMR spectra for heteroleptic triazenide <b>2a</b> .                                                                                                                                               | S3 |
| <b>Figure S3a.</b> Molecular structure of <b>4b</b> showing intramolecular C–H $\cdots$ N contacts.                                                                                                                                 | S4 |
| <b>Figure S3b.</b> VT $^1\text{H}$ NMR spectra of homoleptic triazenide <b>4b</b> .                                                                                                                                                 | S4 |
| <b>Figure S4.</b> VT $^1\text{H}$ NMR spectra of homoleptic triazenide <b>4c</b>                                                                                                                                                    | S5 |
| <b>Figure S5.</b> DFT-optimized structures of $S_4$ -symmetric $[\text{Mg}(\text{N}_3\text{Ph}_2)_2]$ ( <b>5<sub>T</sub></b> ) and $C_1$ -symmetric square planar $[\text{Mg}(\text{N}_3\text{Ph}_2)_2]$ ( <b>5<sub>SP</sub></b> ). | S6 |
| <b>Table S1.</b> Coordinates for DFT-optimized <b>5<sub>T</sub></b> .                                                                                                                                                               | S7 |
| <b>Table S2.</b> Coordinates for DFT-optimized <b>5<sub>SP</sub></b> .                                                                                                                                                              | S8 |

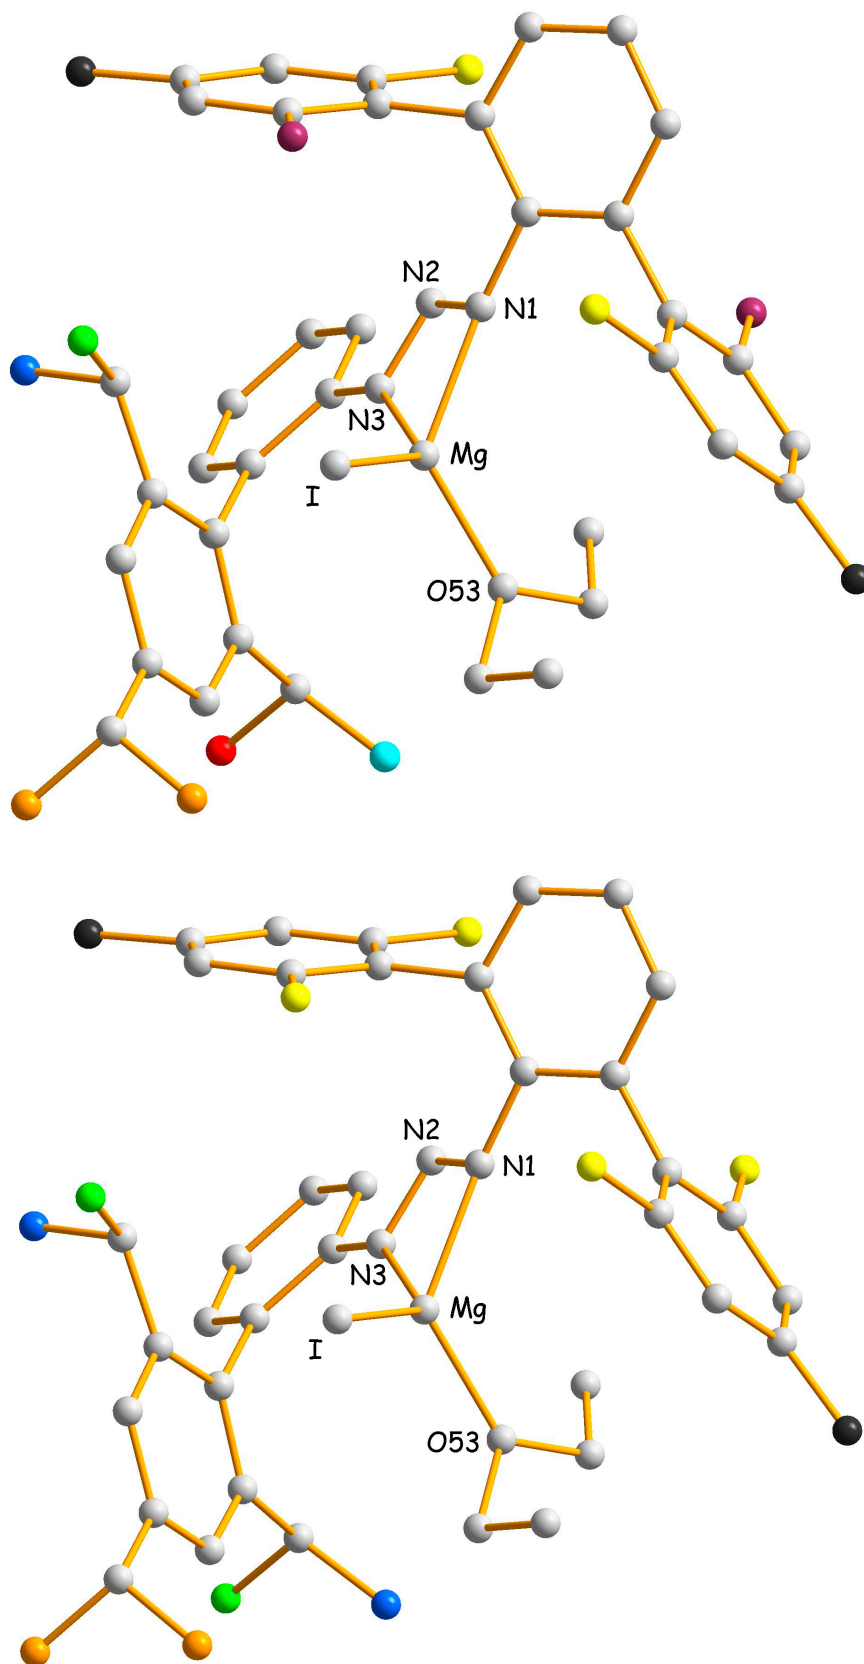

**Figure S1.** Molecular model of triazenide **2a** showing magnetically-equivalent methyl groups at 273 K (top) and 373 K (bottom).

**Figure S2.** VT  $^1\text{H}$  NMR spectra for heteroleptic triazenide **2a** in  $[\text{D}_8]\text{toluene}$ .

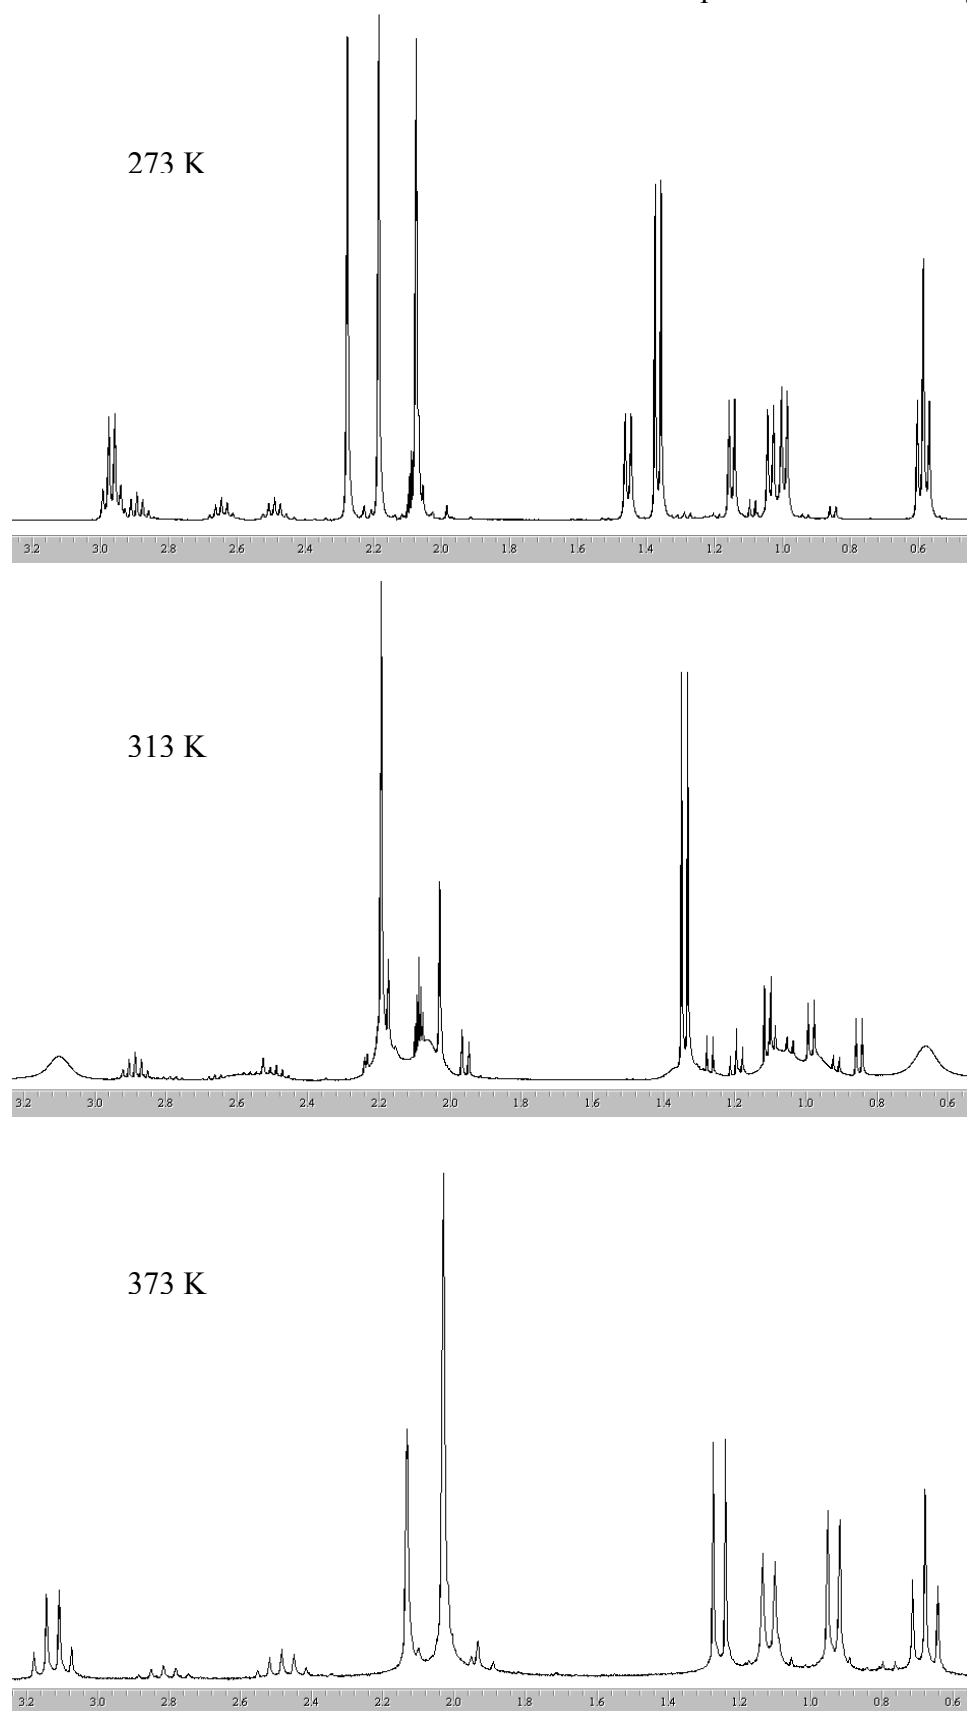

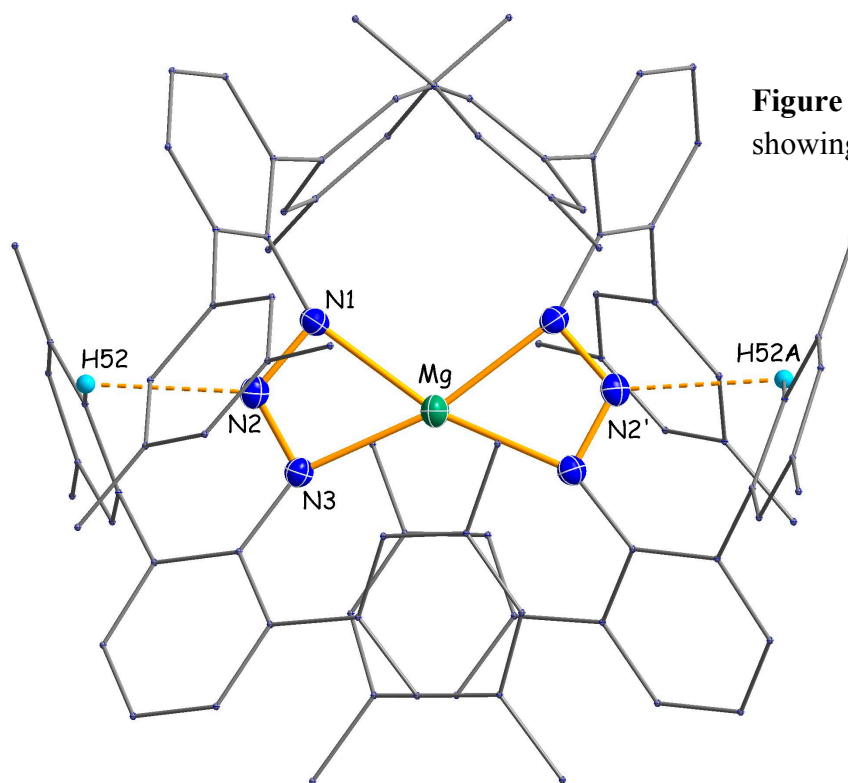

**Figure S3a.** Molecular structure of **4b**, showing intramolecular C–H···N contacts.

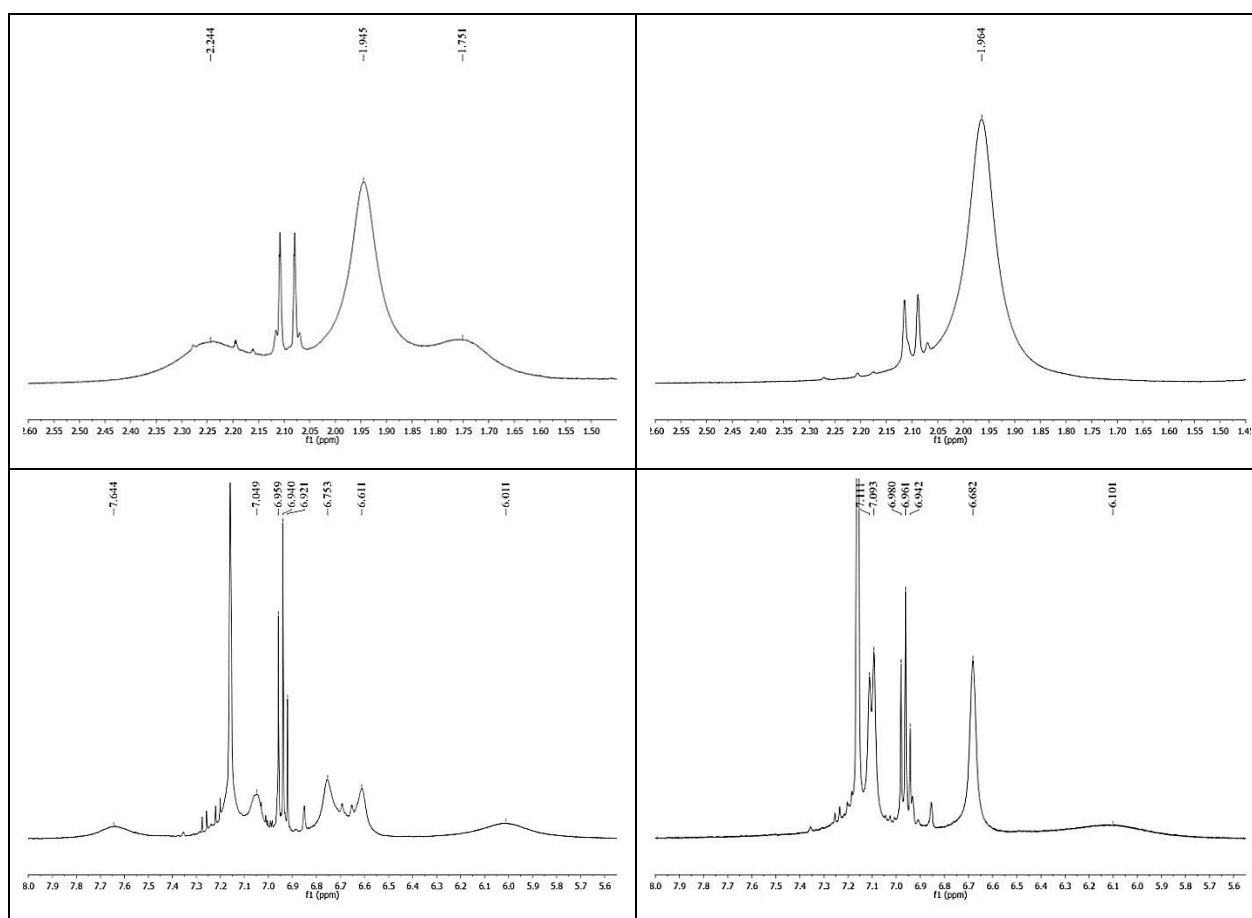

**Figure S3b.** VT  $^1\text{H}$  NMR spectra of homoleptic triazenide **4b** at 298 K (left column) and 338 K (right column) in  $[\text{D}_6]\text{benzene}$ .

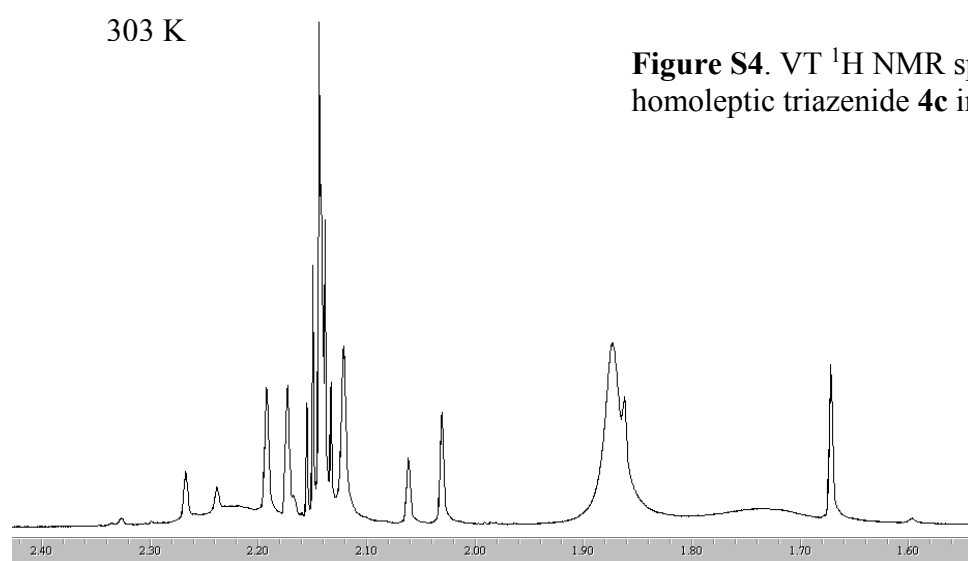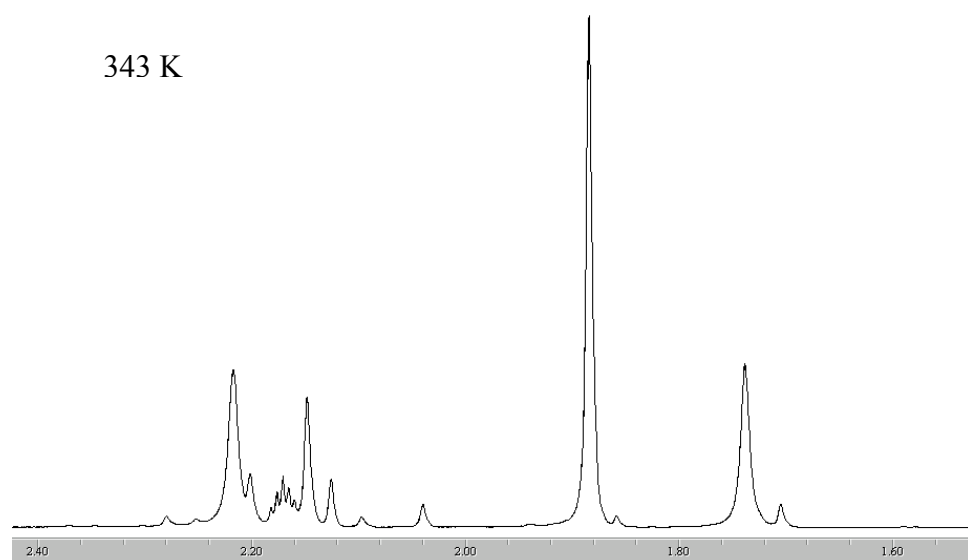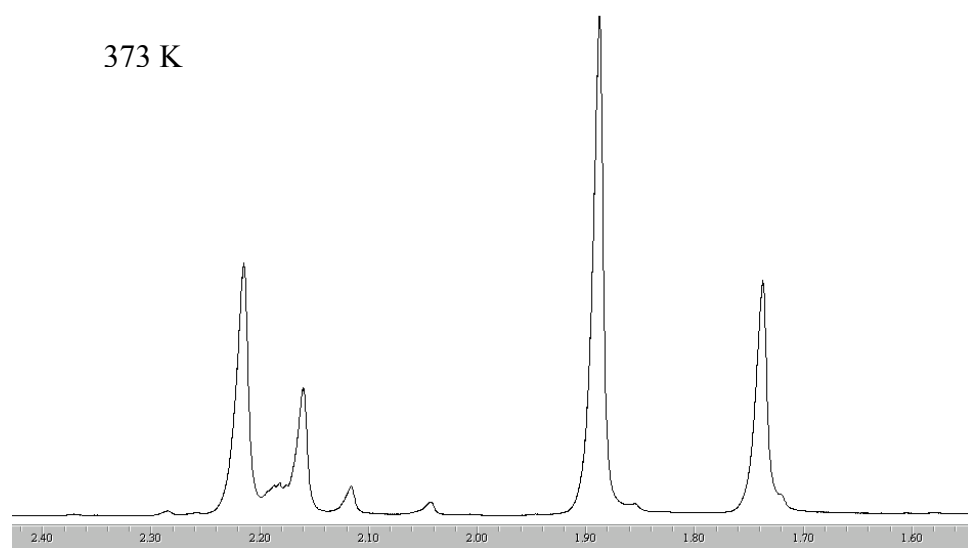

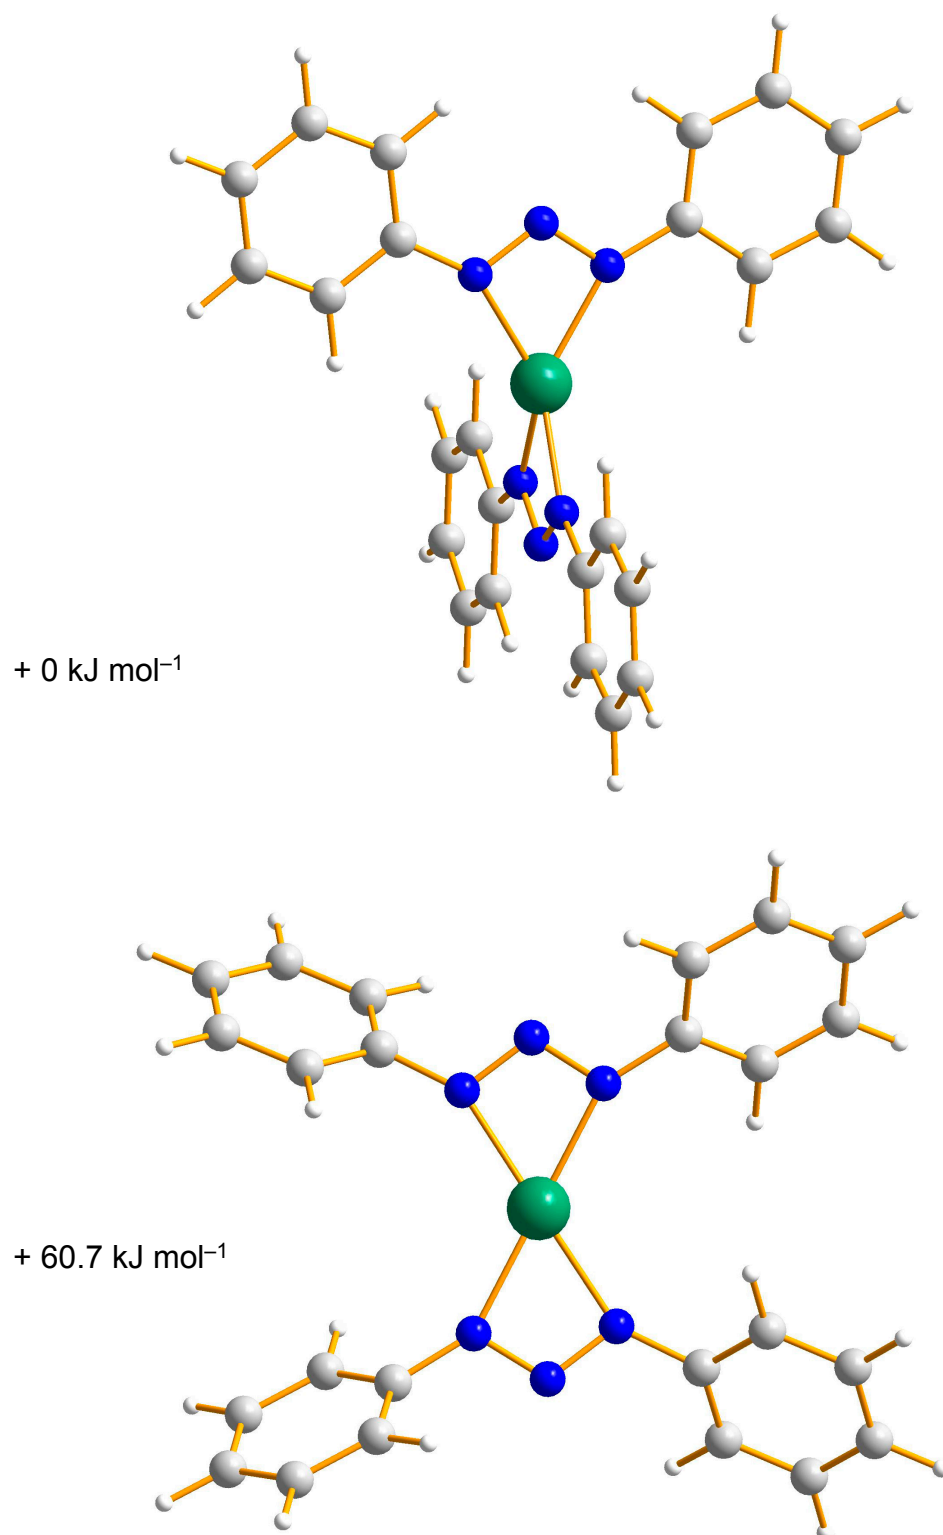

**Figure S5.** DFT-optimized structures of S<sub>4</sub>-symmetric [Mg(N<sub>3</sub>Ph<sub>2</sub>)<sub>2</sub>] (**5<sub>r</sub>**) and C<sub>1</sub>-symmetric square planar [Mg(N<sub>3</sub>Ph<sub>2</sub>)<sub>2</sub>] (**5<sub>sp</sub>**) showing ZPE-corrected relative energies.

**Table S1.** Coordinates for DFT-optimized **5<sub>r</sub>** at the B3LYP/6-311+G\* level of theory.

|    |           |          |          |   |          |           |           |
|----|-----------|----------|----------|---|----------|-----------|-----------|
| Mg | 0.000000  | 0.000000 | 0.000000 | N | 0.000000 | -1.070453 | -1.802739 |
| N  | 1.070453  | 0.000000 | 1.802739 | N | 0.000000 | 0.000000  | -2.547070 |
| N  | 0.000000  | 0.000000 | 2.547070 | N | 0.000000 | 1.070453  | -1.802739 |
| N  | -1.070453 | 0.000000 | 1.802739 | C | 0.000000 | -2.316960 | -2.448803 |
| C  | 2.316960  | 0.000000 | 2.448803 | C | 0.000000 | -2.477358 | -3.844183 |
| C  | 2.477358  | 0.000000 | 3.844183 | H | 0.000000 | -1.603359 | -4.482795 |
| H  | 1.603359  | 0.000000 | 4.482795 | C | 0.000000 | -3.753504 | -4.395097 |
| C  | 3.753504  | 0.000000 | 4.395097 | H | 0.000000 | -3.864456 | -5.475040 |
| H  | 3.864456  | 0.000000 | 5.475040 | C | 0.000000 | -4.887040 | -3.579493 |
| C  | 4.887040  | 0.000000 | 3.579493 | H | 0.000000 | -5.878743 | -4.019123 |
| H  | 5.878743  | 0.000000 | 4.019123 | C | 0.000000 | -4.729724 | -2.194629 |
| C  | 4.729724  | 0.000000 | 2.194629 | H | 0.000000 | -5.600194 | -1.546443 |
| H  | 5.600194  | 0.000000 | 1.546443 | C | 0.000000 | -3.457091 | -1.632397 |
| C  | 3.457091  | 0.000000 | 1.632397 | H | 0.000000 | -3.338344 | -0.552949 |
| H  | 3.338344  | 0.000000 | 0.552949 | C | 0.000000 | 2.316960  | -2.448803 |
| C  | 2.316960  | 0.000000 | 2.448803 | C | 0.000000 | 2.477358  | -3.844183 |
| C  | 2.477358  | 0.000000 | 3.844183 | H | 0.000000 | 1.603359  | -4.482795 |
| H  | -1.603359 | 0.000000 | 4.482795 | C | 0.000000 | 3.753504  | -4.395097 |
| C  | -3.753504 | 0.000000 | 4.395097 | H | 0.000000 | 3.864456  | -5.475040 |
| H  | -3.864456 | 0.000000 | 5.475040 | C | 0.000000 | 4.887040  | -3.579493 |
| C  | -4.887040 | 0.000000 | 3.579493 | H | 0.000000 | 5.878743  | -4.019123 |
| H  | -5.878743 | 0.000000 | 4.019123 | C | 0.000000 | 4.729724  | -2.194629 |
| C  | -4.729724 | 0.000000 | 2.194629 | H | 0.000000 | 5.600194  | -1.546443 |
| H  | -5.600194 | 0.000000 | 1.546443 | C | 0.000000 | 3.457091  | -1.632397 |
| C  | -3.457091 | 0.000000 | 1.632397 | H | 0.000000 | 3.338344  | -0.552949 |
| H  | -3.338344 | 0.000000 | 0.552949 |   |          |           |           |

**Table S2.** Coordinates for DFT-optimized **5<sub>SP</sub>** at the B3LYP/6-311+G\* level of theory.

|                                 |                                |
|---------------------------------|--------------------------------|
| Mg -0.015128 0.000506 0.000135  | N -1.076721 1.820445 0.023562  |
| N -1.076542 -1.820807 -0.023707 | N -0.000874 2.555000 0.030953  |
| N -0.000650 -2.555680 -0.030861 | N 1.055010 1.810016 0.203623   |
| N 1.054577 -1.810862 -0.203538  | C -2.300999 2.508953 -0.171536 |
| C -2.300905 -2.509103 0.171428  | C -2.508289 3.344582 -1.275499 |
| C -2.508482 -3.344517 1.275526  | H -1.691093 3.525290 -1.965352 |
| H -1.691375 -3.525259 1.965479  | C -3.748412 3.946206 -1.472638 |
| C -3.748718 -3.945899 1.472685  | H -3.896346 4.600934 -2.325740 |
| H -3.896813 -4.600465 2.325887  | C -4.801269 3.696976 -0.592337 |
| C -4.801493 -3.696626 0.592295  | H -5.769111 4.160284 -0.753592 |
| H -5.769429 -4.159734 0.753569  | C -4.604959 2.839963 0.489902  |
| C -4.604943 -2.839832 -0.490074 | H -5.419997 2.634289 1.176476  |
| H -5.419896 -2.634133 -1.176747 | C -3.364237 2.242213 0.696777  |
| C -3.364085 -2.242375 -0.696987 | H -3.208692 1.571617 1.535483  |
| H -3.208350 -1.572005 -1.535842 | C 2.295134 2.492167 0.253673   |
| C 2.294989 -2.492579 -0.253592  | C 3.359228 2.023781 -0.524391  |
| C 3.358962 -2.023730 0.524351   | H 3.198711 1.191082 -1.201548  |
| H 3.198191 -1.191029 1.201448   | C 4.611225 2.627673 -0.435826  |
| C 4.611169 -2.627182 0.435769   | H 5.426271 2.263087 -1.052872  |
| H 5.426120 -2.262260 1.052743   | C 4.818066 3.694002 0.438457   |
| C 4.818351 -3.693489 -0.438462  | H 5.794352 4.162516 0.507176   |
| H 5.794806 -4.161647 -0.507211  | C 3.764361 4.146739 1.232732   |
| C 3.764766 -4.146660 -1.232650  | H 3.920472 4.966383 1.927091   |
| H 3.921138 -4.966288 -1.926970  | C 2.513315 3.541255 1.155437   |
| C 2.513495 -3.541644 -1.155301  | H 1.695550 3.879118 1.782333   |
| H 1.695804 -3.879863 -1.782102  |                                |
